# Supplementary material for: Trends in alkyl substituent effects on nucleophilic reactions of carbonyl compounds: Gas phase reactions between ammonia and R1R2COCH3+ oxonium ionsElectronic supplementary information (ESI) available: proton affinities, geometries and energies of optimised structures, structures of the stationary points and a plot of experimental and RRKM ln(kae/ksub) against a-stabilisation constants. See http://www.rsc.org/suppdata/ob/b2/b209955c/
Source: Royal Society of Chemistry journal article supplement (doi:10.1039/b209955c), 2003-01-30
Supplement: figs2.doc [file figs2.doc]

**Fig. S2** A plot of ln(kae/ksub) (both experimental and theoretical (RRKM) values) against the *a*-stabilisation constants.
