# Supplementary material for: Trends in alkyl substituent effects on nucleophilic reactions of carbonyl compounds: Gas phase reactions between ammonia and R1R2COCH3+ oxonium ionsElectronic supplementary information (ESI) available: proton affinities, geometries and energies of optimised structures, structures of the stationary points and a plot of experimental and RRKM ln(kae/ksub) against a-stabilisation constants. See http://www.rsc.org/suppdata/ob/b2/b209955c/
Source: Royal Society of Chemistry journal article supplement (doi:10.1039/b209955c), 2003-01-30
Supplement: tables.doc [file tables.doc]

Table S1. Proton affinities of some selected compounds, given in kJ/mol. Data taken from the literature [83].

| **Compound** | **PA [kJ/mol]** |
| --- | --- |
| NH3 | 853.6 |
| CH3NH2 | 899.0 |
| CH2O | 712.9 |
| CH3CHO | 768.5 |
| C2H5CHO | 786.0 |
| *i*-C3H7CHO | 797.3 |
| (CH3)2CO | 812 |
| CH3CHNH2 | 885.1 |
| (CH3)2CNH2 | 932.3 |
| CH2CHOCH3 | 859.2 |
| CH2C(CH3)OCH3 | 894 |

Table S2. Geometries for the optimised structures shown in Figure S1. Bond lengths are given in Angstroms and angles in degrees.

| **Structure** | **r1** | **r2** | **r3** | **r4** | **r5** | **12** | **23** | **45** |
| --- | --- | --- | --- | --- | --- | --- | --- | --- |
| **CH3CHOCH3+ (1a)** | 1.260 | 1.486 |  |  |  |  |  |  |
| **C2H5CHOCH3+ (1b)** | 1.262 | 1.485 |  |  |  | 121.2 |  |  |
| ***i*-C3H7CHOCH3+ (1c)** | 1.263 | 1.483 |  |  |  |  |  |  |
| **(CH3)2COCH3+ (1d)** | 1.273 | 1.479 |  |  |  | 122.4 |  |  |
| **NH3 (2)** | 1.013 |  |  |  |  |  |  |  |
| **NH3…CH(CH3)OCH3+ (3a)** | 1.519 | 1.390 | 1.444 |  |  | 100.5 | 114.2 |  |
| **NH3…CH(C2H5)OCH3+ (3b)** | 1.520 | 1.391 | 1.444 |  |  | 100.6 | 114.2 |  |
| **NH3…CH(*i*-C3H7)OCH3+ (3c)** | 1.555 | 1.375 | 1.444 |  |  | 105.6 | 115.4 |  |
| **NH3…C(CH3)2OCH3+ (3d)** | 1.528 | 1.404 | 1.442 |  |  | 97.9 | 116.5 |  |
| **AE-TS(CH3CHOCH3+) (4a)** | 1.472 | 1.496 | 1.464 | 1.193 | 1.361 | 92.3 | 118.8 | 113.6 |
| **AE-TS(C2H5CHOCH3+) (4b)** | 1.472 | 1.497 | 1.464 | 1.193 | 1.361 | 92.3 | 118.7 | 113.8 |
| **AE-TS(*i*-C3H7CHOCH3+) (4c)** | 1.473 | 1.501 | 1.465 | 1.195 | 1.356 | 92.4 | 118.2 | 114.5 |
| **AE-TS((CH3)2COCH3+) (4d)** | 1.478 | 1.519 | 1.459 | 1.182 | 1.360 | 90.5 | 123.2 | 113.5 |
| **CH3CHNH2…CH3OH+ (5a)** | 1.290 | 2.561 |  |  |  | 104.4 |  |  |
| **C2H5CHNH2…CH3OH+ (5b)** | 1.291 | 2.548 |  |  |  | 103.6 |  |  |
| ***i*-C3H7CHNH2…CH3OH+ (5c')** | 1.287 | 1.050 | 1.631 |  |  |  | 165.0 |  |
| **(CH3)2CNH2…CH3OH+ (5d)** | 1.295 | 2.668 |  |  |  | 95.7 |  |  |
| **CH3CHNH2+ (6a)** | 1.289 |  |  |  |  |  |  |  |
| **C2H5CHNH2+ (6b)** | 1.290 |  |  |  |  |  |  |  |
| ***i*-C3H7CHNH2+ (6c)** | 1.291 |  |  |  |  |  |  |  |
| **(CH3)2CNH2+ (6d)** | 1.296 |  |  |  |  |  |  |  |
| **CH3OH (7)** | 1.421 |  |  |  |  |  |  |  |
| **CH3CHOCH3…NH3+ (8a)** | 1.256 | 1.512 | 2.780 |  |  | 120.9 | 178.6 |  |
| **C2H5CHOCH3…NH3+ (8b)** | 1.258 | 1.509 | 2.790 |  |  | 120.8 | 178.6 |  |
| ***i*-C3H7CHOCH3…NH3+ (8c)** | 1.259 | 1.507 | 2.801 |  |  | 120.8 | 178.6 |  |
| **(CH3)2COCH3…NH3+ (8d)** | 1.269 | 1.498 | 2.838 |  |  | 122.2 | 178.1 |  |
| **SUB-TS(CH3CHOCH3+) (9a)** | 1.244 | 1.812 | 2.142 |  |  | 120.6 | 177.7 |  |
| **SUB -TS(C2H5CHOCH3+) (9b)** | 1.245 | 1.817 | 2.133 |  |  | 120.4 | 177.7 |  |
| **SUB -TS(*i*-C3H7CHOCH3+) (9c)** | 1.245 | 1.823 | 2.123 |  |  | 120.3 | 177.8 |  |
| **SUB -TS((CH3)2COCH3+) (9d)** | 1.251 | 1.841 | 2.113 |  |  | 125.5 | 175.8 |  |
| **CH3CHO…CH3NH3+ (10a)** | 1.229 | 2.726 | 1.512 |  |  | 165.2 | 171.3 |  |
| **C2H5CHO…CH3NH3+ (10b)** | 1.229 | 2.718 | 1.512 |  |  | 166.9 | 171.3 |  |
| ***i*-C3H7CHO…CH3NH3+ (10c)** | 1.230 | 2.714 | 1.512 |  |  | 167.2 | 171.2 |  |
| **(CH3)2CO…CH3NH3+ (10d)** | 1.234 | 2.703 | 1.512 |  |  | 171.6 | 170.3 |  |
| **CH3NH3+ (11)** | 1.507 |  |  |  |  |  |  |  |
| **CH3CHO (12a)** | 1.223 |  |  |  |  |  |  |  |
| **C2H5CHO (12b)** | 1.224 |  |  |  |  |  |  |  |
| ***i*-C3H7CHO (12c)** | 1.224 |  |  |  |  |  |  |  |
| **(CH3)2CO (12d)** | 1.227 |  |  |  |  |  |  |  |
| **NH3…CH3CHOCH3+ (13a)** | 1.968 | 1.129 | 1.441 | 1.268 |  | 173.3 | 106.0 |  |
| **NH3…C2H5CHOCH3+ (13b,cis)** | 1.972 | 1.132 | 1.440 | 1.270 |  | 169.7 | 103.2 |  |
| **NH3…C2H5CHOCH3+ (13b,trans)** | 1.990 | 1.128 | 1.441 | 1.269 |  | 168.8 | 103.5 |  |
| **NH3…*i*-C3H7CHOCH3+ (13c)** | 1.978 | 1.134 | 1.440 | 1.292 |  | 166.8 | 100.6 |  |
| **NH3…(CH3)2COCH3+ (13d'')** | 2.292 | 2.430 | 1.482 | 1.274 | 1.475 | 54.9 |  | 122.1 |
| **PT-TS(CH3CHOCH3+) (14a)** | 1.447 | 1.299 | 1.396 | 1.292 |  | 169.5 | 106.0 |  |
| **PT-TS(C2H5CHOCH3+) (14b,cis)** | 1.476 | 1.287 | 1.395 | 1.295 |  | 166.1 | 101.3 |  |
| **PT-TS(C2H5CHOCH3+) (14b,trans)** | 1.469 | 1.290 | 1.395 | 1.295 |  | 166.6 | 100.9 |  |
| **PT-TS(*i*-C3H7CHOCH3+) (14c)** | 1.515 | 1.273 | 1.397 | 1.297 |  | 163.5 | 96.2 |  |
| **PT-TS((CH3)2COCH3+) (14d'')** | 1.381 | 1.351 | 1.400 | 1.490 |  | 170.9 | 104.6 |  |
| **CH2CHOCH3…NH4+ (15a)** | 1.070 | 1.574 | 1.395 | 1.332 |  | 169.0 | 109.5 |  |
| **CH3CHCHOCH3…NH4+ (15b,cis)** | 1.075 | 1.551 | 1.401 | 1.336 |  | 170.3 | 109.7 |  |
| **CH3CHCHOCH3…NH4+ (15b,trans)** | 1.079 | 1.536 | 1.403 | 1.335 |  | 170.0 | 111.0 |  |
| **(CH3)2CCHOCH3…NH4+ (15c)** | 1.083 | 1.523 | 1.406 | 1.339 |  | 169.8 | 110.2 |  |
| **CH2C(CH3)OCH3…NH4+ (15d'')** | 1.020 | 1.891 | 1.364 | 1.343 |  | 171.5 | 93.6 |  |
| **NH4+ (16)** | 1.023 |  |  |  |  |  |  |  |
| **CH2CHOCH3 (17a)** | 1.340 | 1.362 |  |  |  |  |  |  |
| **CH3CHCHOCH3 (17b',cis)** | 1.338 | 1.374 |  |  |  |  |  |  |
| **CH3CHCHOCH3 (17b,trans)** | 1.342 | 1.365 |  |  |  |  |  |  |
| **(CH3)2CCHOCH3 (17c')** | 1.341 | 1.376 |  |  |  |  |  |  |
| **CH2C(CH3)OCH3 (17d'')** | 1.343 | 1.371 |  |  |  |  |  |  |
| **Other relevant stationary points:** |  |  |  |  |  |  |  |  |
| ***i*-C3H7CHNH2…CH3OH+ (5c)** | 1.292 | 2.507 |  |  |  | 102.9 |  |  |
| **CH2OCH3+** | 1.249 | 1.494 |  |  |  | 121.6 |  |  |
| **AE-TS(CH2OCH3+)** | 1.463 | 1.477 | 1.467 | 1.200 | 1.365 | 93.2 | 119.2 | 112.7 |
| **SUB-TS(CH2OCH3+)** | 1.239 | 1.775 | 2.205 |  |  | 120.7 | 177.7 |  |

Table S3. Absolute energies for the optimised structures shown in Figure S1.

| **Structure** | **HF/3-21G** | **MP2/6-31G(d,p)** |
| --- | --- | --- |
|  | **(Hartree)a** | **(Hartree)a** |
| **CH3CHOCH3+ (1a)** | -191.10482 | -192.77432 |
| **C2H5CHOCH3+ (1b)** | -229.90091 | -231.93194 |
| ***i*-C3H7CHOCH3+ (1c)** | -268.69748 | -271.09059 |
| **(CH3)2COCH3+ (1d)** | -229.91940 | -231.94999 |
| **NH3 (2)** | -55.83903 | -56.34913 |
| **NH3…CH(CH3)OCH3+ (3a)** | -247.00458 | -249.17456 |
| **NH3…CH(C2H5)OCH3+ (3b)** | -285.79787 | -288.33009 |
| **NH3…CH(*i*-C3H7)OCH3+ (3c)** | -324.59261 | -327.48894 |
| **NH3…C(CH3)2OCH3+ (3d)** | -285.80695 | -288.34053 |
| **AE-TS(CH3CHOCH3+) (4a)** | -246.96675 | -249.13656 |
| **AE-TS(C2H5CHOCH3+) (4b)** | -285.76031 | -288.29234 |
| **AE-TS(*i*-C3H7CHOCH3+) (4c)** | -324.55334 | -327.45111 |
| **AE-TS((CH3)2COCH3+) (4d)** | -285.77012 | -288.30325 |
| **CH3CHNH2…CH3OH+ (5a)** | -247.00060 | -249.16814 |
| **C2H5CHNH2…CH3OH+ (5b)** | -285.79443 | -288.32353 |
| ***i*-C3H7CHNH2…CH3OH+ (5c')** | -324.58865 | -327.49537 |
| **(CH3)2CNH2…CH3OH+ (5d)** | -285.80535 | -288.34062 |
| **CH3CHNH2+ (6a)** | -132.62429 | -133.81559 |
| **C2H5CHNH2+ (6b)** | -171.41914 | -172.97283 |
| ***i*-C3H7CHNH2+ (6c)** | -210.21564 | -212.13110 |
| **(CH3)2CNH2+ (6d)** | -171.43613 | -172.99004 |
| **CH3OH (7)** | -114.34784 | -115.33112 |
| **CH3CHOCH3…NH3+ (8a)** | -246.96493 | -249.14143 |
| **C2H5CHOCH3…NH3+ (8b)** | -285.75991 | -288.29863 |
| ***i*-C3H7CHOCH3…NH3+ (8c)** | -324.55599 | -327.45689 |
| **(CH3)2COCH3…NH3+ (8d)** | -285.77688 | -288.31561 |
| **SUB-TS(CH3CHOCH3+) (9a)** | -246.95953 | -249.13070 |
| **SUB -TS(C2H5CHOCH3+) (9b)** | -285.75453 | -288.28703 |
| **SUB -TS(*i*-C3H7CHOCH3+) (9c)** | -324.54972 | -327.44437 |
| **SUB -TS((CH3)2COCH3+) (9d)** | -285.76805 | -288.29953 |
| **CH3CHO…CH3NH3+ (10a)** | -247.00351 | -249.17885 |
| **C2H5CHO…CH3NH3+ (10b)** | -285.79754 | -288.33380 |
| ***i*-C3H7CHO…CH3NH3+ (10c)** | -324.59169 | -327.49009 |
| **(CH3)2CO…CH3NH3+ (10d)** | -285.80963 | -288.34578 |
| **CH3NH3+ (11)** | -152.00019 | -153.32359 |
| **CH3CHO (12a)** | -190.79404 | -192.47835 |
| **C2H5CHO (12b)** | -229.58768 | -231.63429 |
| ***i*-C3H7CHO (12c)** | -190.80444 | -192.48864 |
| **(CH3)2CO (12d)** | -94.98169 | -95.83805 |
| **NH3…CH3CHOCH3+ (13a)** | -246.96617 | -249.14296 |
| **NH3…C2H5CHOCH3+ (13b,cis)** | -285.76078 | -288.30010 |
| **NH3…C2H5CHOCH3+ (13b,trans)** | -285.75950 | -288.29838 |
| **NH3…*i*-C3H7CHOCH3+ (13c)** | -324.55575 | -327.45816 |
| **NH3…(CH3)2COCH3+ (13d'')** | -285.78137 | -288.31943 |
| **PT-TS(CH3CHOCH3+) (14a)** | -246.96364 | -249.14227 |
| **PT-TS(C2H5CHOCH3+) (14b,cis)** | -285.75727 | -288.29990 |
| **PT-TS(C2H5CHOCH3+) (14b,trans)** | -285.75548 | -288.29804 |
| **PT-TS(*i*-C3H7CHOCH3+) (14c)** | -324.55102 | -327.45870 |
| **PT-TS((CH3)2COCH3+) (14d'')** | -285.77425 | -288.31299 |
| **CH2CHOCH3…NH4+ (15a)** | -247.00286 | -249.15835 |
| **CH3CHCHOCH3…NH4+ (15b,cis)** | -285.80045 | -288.31828 |
| **CH3CHCHOCH3…NH4+ (15b,trans)** | -285.80049 | -288.31855 |
| **(CH3)2CCHOCH3…NH4+ (15c)** | -324.59829 | -327.48044 |
| **CH2C(CH3)OCH3…NH4+ (15d'')** | -285.77959 | -288.31532 |
| **NH4+ (16)** | -190.77077 | -192.44014 |
| **CH2CHOCH3 (17a)** | -229.56205 | -231.59449 |
| **CH3CHCHOCH3 (17b',cis)** | -229.56370 | -231.59656 |
| **CH3CHCHOCH3 (17b,trans)** | -268.35718 | -270.75430 |
| **(CH3)2CCHOCH3 (17c')** | -229.56995 | -231.60284 |
| **CH2C(CH3)OCH3 (17d'')** | -56.18545 | -56.68478 |

a Zero-point vibrational energy scaled by 0.9207 [HF/3-21G] and 0.9608 [MP2/6-31(d,p)] are included in all the energies.

Table S4. Cartesian co-ordinates for all the optimised points (MP2/6-31G(d,p)).

Structure 1a

6 .508109 .391223 .000020

8 -.457835 -.418140 -.000016

6 1.881566 -.108471 .000005

1 .290436 1.460604 .000057

6 -1.865121 .059033 -.000008

1 -2.302277 -.363315 -.896628

1 -1.876318 1.144355 .000028

1 -2.302288 -.363374 .896579

1 2.394256 .304309 .873135

1 2.394223 .304292 -.873154

1 1.917316 -1.192463 .000010

Structure 1b

6 .108301 .737639 -.000009

8 .811688 -.309565 .000008

6 -1.352431 .648177 .000016

1 .616936 1.703768 -.000036

6 2.294806 -.240463 -.000007

1 2.599825 -.766257 .896410

1 2.605592 .799452 -.000041

1 2.599809 -.766312 -.896397

1 -1.677806 1.245750 -.862345

1 -1.677759 1.245691 .862438

6 -1.933343 -.757431 -.000009

1 -3.017451 -.693812 -.000027

1 -1.623339 -1.309658 .883550

1 -1.623309 -1.309638 -.883570

Structure 1c

6 0.330538 -0.413689 -0.441444

8 1.217285 0.287200 0.123037

6 -1.072886 0.000080 -0.431972

1 0.635054 -1.355196 -0.904614

6 2.633631 -0.151405 0.157511

1 3.186635 0.643610 -0.327537

1 2.728913 -1.100482 -0.360545

1 2.880922 -0.226029 1.209442

6 -1.838728 -1.085520 0.375182

1 -1.401079 -0.099320 -1.474616

6 -1.305582 1.410321 0.090657

1 -2.364669 1.643805 0.018215

1 -0.753059 2.148368 -0.486917

1 -1.009076 1.490572 1.134644

1 -2.898619 -0.853135 0.309978

1 -1.541354 -1.061929 1.421700

1 -1.683774 -2.086585 -0.023646

Structure 1d

6 -0.464661 -0.017895 -0.003959

8 0.587953 -0.733973 0.022912

6 -1.738854 -0.760345 -0.013004

6 1.945115 -0.146021 0.037548

1 2.596436 -1.002945 -0.065288

1 2.087381 0.350208 0.991790

1 2.042652 0.535347 -0.800256

1 -2.326045 -0.436484 -0.874621

1 -2.307264 -0.476551 0.875837

1 -1.575401 -1.832197 -0.035918

6 -0.416038 1.461881 -0.036961

1 -1.411151 1.879791 0.068909

1 0.233804 1.846139 0.749642

1 0.002586 1.782758 -0.995136

Structure 2

7 .061975 -.047986 -.087686

1 .075086 .964221 -.106424

1 -.914710 -.314111 -.106426

1 .405801 -.314208 .826651

Structure 3a

6 -0.354353 0.055192 0.340332

8 0.703722 -0.522735 -0.351783

1 -0.230097 -0.011917 1.426823

6 -0.733484 1.448216 -0.105316

7 -1.473845 -0.911169 -0.008375

1 -1.199397 -1.858749 0.265637

6 2.006922 -0.075931 0.080213

1 -1.596226 -0.914559 -1.025634

1 -2.365314 -0.673012 0.432727

1 2.714073 -0.685069 -0.469573

1 2.126571 -0.238513 1.151703

1 2.159108 0.973916 -0.162068

1 -1.637689 1.796514 0.392537

1 -0.867752 1.473168 -1.185680

1 0.069349 2.133420 0.155041

Structure 3b

6 .084096 .218812 .258676

8 1.356082 .277134 -.300332

6 -.864116 -.774230 -.382542

1 .108961 .110731 1.349951

7 -.401895 1.634955 -.001963

1 .262456 2.298993 .404632

6 2.254972 -.752895 .163172

1 -1.337112 1.813067 .370386

1 -.409087 1.795201 -1.013923

1 3.216897 -.509229 -.271533

1 1.934665 -1.734600 -.179646

1 2.321061 -.735630 1.251501

1 -.438958 -1.761917 -.203497

1 -.842075 -.618101 -1.463497

6 -2.287164 -.719306 .170180

1 -2.872111 -1.542445 -.231452

1 -2.810422 .196401 -.109672

1 -2.296385 -.808510 1.256229

Structure 3c

6 .259828 .255577 .185108

8 1.300892 -.337214 -.489397

6 -1.082145 -.234352 -.328602

1 .337424 .171036 1.274644

7 .392910 1.779074 -.097478

1 .331798 1.920098 -1.109678

6 2.493712 -.565597 .292036

1 1.304881 2.126191 .207372

1 -.336099 2.333468 .357100

1 3.202165 -1.027201 -.385456

1 2.276906 -1.235770 1.122058

1 2.910594 .370672 .669138

6 -1.202636 -1.723705 -.004026

1 -1.062998 -.117248 -1.417350

6 -2.250338 .558089 .260065

1 -3.188737 .096193 -.037657

1 -2.295839 1.591098 -.090178

1 -2.217801 .555380 1.350927

1 -2.133115 -2.110970 -.412964

1 -1.219275 -1.882340 1.075056

1 -.377939 -2.286481 -.432977

Structure 3d

6 0.336065 0.000011 0.076052

8 -0.788161 0.000025 -0.765304

6 0.498965 1.272388 0.886671

6 0.498726 -1.272192 0.886989

7 1.411126 -0.000222 -1.009428

1 1.280063 -0.824345 -1.603249

6 -2.076070 0.000022 -0.117667

1 2.361968 -0.000210 -0.633881

1 1.280145 0.823731 -1.603504

1 -2.793562 0.000165 -0.929802

1 -2.211751 0.893802 0.488254

1 -2.211851 -0.893892 0.488032

1 1.477764 -1.314185 1.363190

1 0.357379 -2.148384 0.255507

1 -0.247444 -1.294616 1.677054

1 1.477985 1.314290 1.362917

1 -0.247246 1.295179 1.676686

1 0.357841 2.148446 0.254955

Structure 4a

6 -.491782 .051352 .373388

8 .735550 -.104151 -.467292

1 -.199382 .066457 1.422454

6 -1.301196 1.234005 -.067712

7 -.996256 -1.275820 -.013493

1 .236842 -1.182290 -.580948

6 2.041605 .172825 .132698

1 -1.805863 -1.256840 -.629781

1 -1.157622 -1.921800 .754633

1 2.768723 -.096472 -.623558

1 2.169230 -.418785 1.036102

1 2.083850 1.236192 .342834

1 -2.228408 1.277815 .501076

1 -1.525228 1.159490 -1.130036

1 -.744513 2.151086 .109761

Structure 4b

6 -.038401 .147373 .253936

8 1.282213 .007545 -.436260

6 -1.096862 -.687640 -.410773

1 .094039 -.057280 1.316606

7 -.084997 1.596497 -.000619

1 1.132832 1.190813 -.452944

6 2.363966 -.699360 .250766

1 -.157752 2.184976 .824904

1 -.774857 1.879399 -.693296

1 3.230330 -.594948 -.390929

1 2.071418 -1.740689 .332454

1 2.537116 -.255164 1.228137

1 -.789959 -1.731426 -.335614

1 -1.112417 -.435410 -1.472845

6 -2.467604 -.485564 .233545

1 -3.198729 -1.125627 -.252994

1 -2.812181 .543012 .134557

1 -2.449158 -.742351 1.291528

Structure 4c

6 .137009 .444584 .247001

8 1.391476 -.008455 -.442283

6 -1.085220 -.225758 -.326902

1 .255282 .303711 1.322436

7 .356023 1.848635 -.141959

1 1.441360 1.175069 -.598052

6 2.393960 -.729628 .345894

1 .450839 2.507520 .626331

1 -.311202 2.201880 -.824366

1 3.246766 -.847442 -.311820

1 1.973275 -1.693760 .607793

1 2.653865 -.154816 1.232028

6 -.990460 -1.740222 -.156487

1 -1.099935 .008034 -1.396622

6 -2.338828 .344543 .340766

1 -3.222260 -.118445 -.092875

1 -2.431689 1.421882 .204839

1 -2.339530 .130258 1.409729

1 -1.888191 -2.208740 -.553633

1 -.914625 -2.009880 .897883

1 -.136686 -2.149186 -.693331

Structure 4d

6 .493096 .076823 .002337

8 -.827437 -.640781 .219173

6 1.137970 .298900 1.344472

7 1.015559 -1.084345 -.747804

1 -.293597 -1.383057 -.530093

6 -2.122061 .027253 .142321

1 1.700149 -1.641981 -.242275

1 1.355538 -.874954 -1.682822

1 -2.850357 -.750999 .337704

1 -2.272189 .467774 -.838180

1 -2.151202 .776907 .926534

1 2.145620 .689112 1.210279

1 1.177905 -.632305 1.906202

1 .562036 1.024825 1.914600

6 .349557 1.298838 -.868498

1 -.128890 1.060634 -1.817464

1 -.227198 2.067532 -.359661

1 1.341391 1.702283 -1.067367

Structure 5a

6 -1.103382 -0.057766 0.427355

8 1.290656 -0.154690 -0.475671

1 -0.425294 -0.184082 1.258465

6 -1.416268 1.290836 -0.076851

7 -1.661436 -1.127646 -0.027913

1 1.538109 -0.270373 -1.401445

6 2.509692 0.029544 0.268244

1 -2.316932 -1.093201 -0.800836

1 -1.431013 -2.041447 0.344470

1 3.048564 0.914369 -0.066593

1 3.154690 -0.844212 0.190939

1 2.224478 0.165031 1.307741

1 -1.854617 1.873052 0.734970

1 -2.096655 1.273119 -0.923921

1 -0.476778 1.763101 -0.355524

Structure 5b

6 .595984 .531600 -.296040

8 -1.765817 -.055556 .457156

6 1.311805 -.452308 .539066

1 .055881 .203210 -1.173150

7 .667915 1.805947 -.105446

1 -2.072940 -.040852 1.372127

6 -2.838077 -.588894 -.341267

1 .188839 2.460182 -.712817

1 1.163201 2.190263 .691401

1 -3.082015 -1.609100 -.049219

1 -2.489956 -.591971 -1.370405

1 -3.728015 .034819 -.273253

1 .573923 -1.194131 .841735

1 1.712330 .025193 1.433541

6 2.430673 -1.121680 -.279493

1 2.922119 -1.864270 .343156

1 3.175352 -.396400 -.599657

1 2.030105 -1.626432 -1.156178

Structure 5c’

6 .521976 -.122114 -.001501

8 -2.787405 -.488357 -.259661

6 1.964461 .026667 .289321

1 .170815 -.033442 -1.026412

7 -.388225 -.355375 .878431

1 -3.227779 -1.327598 -.444290

6 -3.789112 .552186 -.202675

1 -1.391036 -.447123 .581452

1 -.132356 -.450999 1.856200

1 -4.304407 .630330 -1.156578

1 -3.258554 1.477251 -.004042

1 -4.503282 .362522 .595684

6 2.737376 -1.065541 -.466717

1 2.122182 -.093104 1.364406

6 2.414625 1.431537 -.141275

1 3.476472 1.538439 .069857

1 1.878878 2.211216 .397153

1 2.265685 1.575242 -1.210916

1 3.798484 -.953205 -.254686

1 2.594451 -.967338 -1.542301

1 2.431314 -2.064118 -.160176

Structure 5d

6 0.000000 1.103704 0.000000

8 -0.559570 -1.449735 -0.000000

6 0.718559 0.936772 1.288060

6 0.718559 0.936772 -1.288060

7 -1.221453 1.536630 0.000000

1 -1.456780 -1.799387 -0.000000

6 0.342965 -2.573259 -0.000000

1 -1.724723 1.695212 -0.864493

1 -1.724723 1.695212 0.864493

1 -0.197214 -3.516521 -0.000000

1 0.970807 -2.533727 0.888635

1 0.970807 -2.533727 -0.888635

1 1.428683 1.759848 -1.389214

1 0.045128 0.937184 -2.140584

1 1.280215 0.008206 -1.269256

1 1.428683 1.759848 1.389214

1 1.280215 0.008206 1.269256

1 0.045128 0.937184 2.140584

Structure 6a

6 -.083828 .460093 .000014

7 -1.187822 -.205278 -.000015

1 -.175621 1.540817 .000046

6 1.246975 -.169096 .000004

1 -1.193051 -1.221504 -.000046

1 -2.089789 .261145 -.000007

1 1.796563 .182458 -.874954

1 1.201218 -1.254356 -.000027

1 1.796553 .182409 .874987

Structure 6b

6 0.812275 0.579877 0.000004

7 1.413298 -0.560971 -0.000059

1 1.448462 1.458792 0.000025

6 -0.656922 0.728720 0.000047

1 0.886411 -1.429626 -0.000083

1 2.425914 -0.629886 -0.000088

6 -1.459216 -0.564516 0.000013

1 -0.893296 1.357166 -0.865560

1 -0.893253 1.357093 0.865720

1 -2.519505 -0.328946 0.000049

1 -1.262297 -1.161179 0.890270

1 -1.262341 -1.161105 -0.890304

Structure 6c

6 -0.866295 0.000002 0.412943

7 -2.031595 -0.000001 -0.142254

1 -0.850818 0.000007 1.499336

6 0.405193 -0.000002 -0.333305

1 -2.129154 -0.000005 -1.153364

1 -2.886397 0.000002 0.405253

6 1.189783 -1.271546 0.036996

6 1.189783 1.271546 0.036984

1 0.190961 -0.000007 -1.404996

1 2.129488 -1.264992 -0.510920

1 0.645706 -2.176292 -0.227082

1 1.417705 -1.291443 1.101947

1 2.129488 1.264987 -0.510932

1 1.417705 1.291453 1.101935

1 0.645706 2.176290 -0.227103

Structure 6d

6 0.000000 0.056561 0.000000

7 0.000000 1.352050 0.000000

6 1.287690 -0.683135 0.000197

6 -1.287690 -0.683135 -0.000197

1 -0.864882 1.882464 -0.000129

1 0.864882 1.882464 0.000129

1 -1.322072 -1.330336 0.876458

1 -1.321834 -1.330276 -0.876906

1 -2.152041 -0.024899 -0.000293

1 1.321834 -1.330276 0.876906

1 2.152041 -0.024899 0.000293

1 1.322072 -1.330336 -0.876458

Structure 7

O -.756937 -.064235 .000000

H -1.064130 .848312 .000000

C .663991 -.031654 .000000

H 1.069635 .460647 -.887604

H .996414 -1.065804 .000000

H 1.069635 .460647 .887604

Structure 8a

6 1.549515 0.392108 0.000002

8 0.714678 -0.546562 -0.000004

6 2.986219 0.106044 0.000000

1 1.177863 1.418283 0.000009

6 -0.770372 -0.263989 -0.000001

1 -1.134373 -0.742792 -0.896571

1 -0.918156 0.807849 0.000006

1 -1.134373 -0.742803 0.896562

7 -3.513422 0.188188 0.000002

1 -4.020172 -0.691269 -0.000003

1 -3.866232 0.694770 0.805615

1 -3.866232 0.694779 -0.805606

1 3.432370 0.586099 -0.874243

1 3.181293 -0.960803 -0.000007

1 3.432371 0.586088 0.874249

Structure 8b

6 -0.933628 0.742036 -0.000001

8 -0.211273 -0.287459 0.000000

6 -2.396258 0.629778 -0.000001

1 -0.444347 1.718445 -0.000003

6 1.293912 -0.176327 0.000000

1 1.564457 0.871387 -0.000001

1 1.603636 -0.692731 -0.896198

1 1.603636 -0.692728 0.896200

7 4.080156 -0.037197 0.000000

1 4.487005 0.426960 0.805637

1 4.485484 -0.967703 0.000002

1 4.487005 0.426957 -0.805638

6 -2.948247 -0.787318 0.000001

1 -2.734039 1.217401 -0.863406

1 -2.734039 1.217404 0.863402

1 -4.033608 -0.748196 0.000001

1 -2.625385 -1.333081 0.882997

1 -2.625385 -1.333084 -0.882993

Structure 8c

6 0.569706 0.313218 -0.460129

8 -0.233446 -0.490214 0.083142

6 2.018753 0.086660 -0.414072

1 0.160563 1.205120 -0.941402

6 -1.716839 -0.227178 0.065402

1 -1.900518 0.698230 -0.464753

1 -1.998790 -0.178622 1.106683

1 -2.140747 -1.087564 -0.430601

7 -4.484580 0.203852 0.064292

1 -4.911752 0.235774 -0.855713

1 -4.963371 -0.547015 0.551101

1 -4.789218 1.054145 0.526984

6 2.629391 1.276204 0.371427

1 2.350772 0.193973 -1.454738

6 2.414750 -1.269889 0.150678

1 3.711503 1.181289 0.330417

1 2.318263 1.243852 1.413898

1 2.355633 2.239224 -0.056558

1 3.496074 -1.371599 0.105645

1 1.970672 -2.085319 -0.416268

1 2.105980 -1.360838 1.190286

Structure 8d

6 1.404510 0.026396 -0.003685

8 0.488953 -0.852594 0.004654

6 1.108518 1.479475 -0.001357

6 2.790282 -0.484966 -0.003379

6 -0.965242 -0.491164 0.003813

1 -1.195626 -0.047627 -0.955570

1 -1.154516 0.183931 0.826742

1 -1.459749 -1.440022 0.136565

7 -3.740895 0.101206 -0.003382

1 -4.213000 -0.400006 -0.748952

1 -4.188864 -0.215102 0.850557

1 -4.031195 1.067609 -0.110848

1 0.653215 1.747796 0.955565

1 0.391700 1.727538 -0.784003

1 2.017314 2.056147 -0.133993

1 2.812312 -1.568254 0.042881

1 3.325102 -0.048942 0.842303

1 3.289545 -0.129211 -0.907168

Structure 9a

6 1.512513 0.355531 0.000006

8 0.671235 -0.560863 -0.000018

6 2.965197 0.087031 -0.000006

1 1.169907 1.397502 0.000036

6 -1.100976 -0.184498 -0.000002

1 -1.257570 -0.705676 -0.925836

1 -0.997756 0.886710 0.000028

1 -1.257564 -0.705727 0.925804

7 -3.212599 0.175197 0.000014

1 -3.732436 -0.698097 -0.000008

1 -3.525355 0.696211 0.814514

1 -3.525360 0.696256 -0.814454

1 3.410315 0.562212 -0.875851

1 3.163406 -0.979412 -0.000037

1 3.410320 0.562162 0.875863

Structure 9b

6 -0.896115 0.713273 -0.000002

8 -0.174994 -0.301218 0.000001

6 -2.374598 0.633064 -0.000002

1 -0.425245 1.705034 -0.000004

6 1.635345 -0.145092 0.000000

1 1.658858 0.930778 -0.000002

1 1.722782 -0.681766 -0.926048

1 1.722782 -0.681762 0.926051

7 3.765644 -0.045538 0.000000

1 4.138122 0.434257 0.814715

1 4.175992 -0.975321 0.000002

1 4.138122 0.434254 -0.814717

6 -2.935751 -0.779717 0.000001

1 -2.709362 1.215145 -0.866151

1 -2.709362 1.215149 0.866146

1 -4.021499 -0.741185 0.000001

1 -2.612023 -1.327619 0.881494

1 -2.612023 -1.327622 -0.881489

Structure 9c

6 0.529594 0.302241 -0.414484

8 -0.279320 -0.506063 0.078015

6 1.996043 0.078994 -0.409209

1 0.151414 1.235177 -0.856044

6 -2.066602 -0.149058 0.055894

1 -1.982577 0.802608 -0.439391

1 -2.126210 -0.191750 1.127259

1 -2.273323 -1.034132 -0.516039

7 -4.161370 0.194509 0.066722

1 -4.548493 0.292246 -0.867791

1 -4.656750 -0.576575 0.505968

1 -4.420326 1.033636 0.578119

6 2.647892 1.252574 0.349111

1 2.296222 0.166709 -1.461250

6 2.388899 -1.281875 0.145993

1 3.728668 1.157729 0.277778

1 2.371403 1.227467 1.402160

1 2.365523 2.218379 -0.068233

1 3.467580 -1.402622 0.080239

1 1.918398 -2.090638 -0.409025

1 2.097671 -1.368554 1.191241

Structure 9d

6 1.373706 -0.020741 -0.010776

8 0.406049 -0.813090 -0.006154

6 1.207959 1.467430 -0.006024

6 2.751675 -0.590212 0.009528

6 -1.370688 -0.330050 -0.003011

1 -1.355865 0.030537 -1.014606

1 -1.286837 0.357943 0.817209

1 -1.624985 -1.354576 0.188190

7 -3.444566 0.072630 0.004498

1 -3.926939 -0.462669 -0.712243

1 -3.872304 -0.179530 0.891258

1 -3.671412 1.049321 -0.160477

1 1.175460 1.802196 1.033711

1 0.293787 1.780579 -0.501353

1 2.061797 1.947079 -0.476767

1 2.719967 -1.665220 0.150869

1 3.332875 -0.114834 0.799797

1 3.242113 -0.353080 -0.936139

Structure 10a

6 2.025999 0.492472 0.000014

8 0.845538 0.151196 -0.000063

6 3.176991 -0.460323 0.000014

1 2.287706 1.563175 0.000075

6 -1.879247 0.089858 -0.000063

1 -1.361046 -0.859161 0.000137

1 -1.633576 0.654805 -0.889585

1 -1.633544 0.655214 0.889191

7 -3.368140 -0.171674 0.000076

1 -3.653390 -0.705601 0.823705

1 -3.903571 0.699009 -0.000081

1 -3.653482 -0.705938 -0.823302

1 3.800001 -0.277637 -0.876150

1 2.821199 -1.486026 -0.000052

1 3.799931 -0.277723 0.876245

Structure 10b

6 -1.491397 -1.030268 -0.000020

8 -0.354294 -0.563031 -0.000007

6 -2.741339 -0.204684 -0.000005

1 -1.635485 -2.123605 -0.000045

6 2.328530 -0.126051 0.000015

1 2.164114 -0.720074 0.889379

1 1.682413 0.741005 -0.000049

1 2.164130 -0.720193 -0.889273

7 3.766491 0.340424 -0.000005

1 4.417939 -0.447224 0.000054

1 3.974642 0.908961 -0.823541

1 3.974628 0.909072 0.823458

6 -2.486740 1.292955 0.000019

1 -3.330579 -0.516663 0.867938

1 -3.330582 -0.516635 -0.867955

1 -3.426830 1.838871 0.000029

1 -1.919899 1.588036 -0.880488

1 -1.919896 1.588009 0.880533

Structure 10c

6 -1.013298 -0.822048 -0.426816

8 0.141163 -0.441449 -0.242170

6 -2.227109 0.059221 -0.358701

1 -1.211097 -1.885829 -0.648389

6 2.828382 -0.172033 0.021001

1 2.569304 -0.911066 0.767696

1 2.223534 0.715986 0.142664

1 2.706655 -0.578974 -0.974204

7 4.281591 0.201229 0.206610

1 4.895171 -0.609317 0.100422

1 4.577829 0.900395 -0.477607

1 4.450792 0.592917 1.135419

6 -3.205413 -0.525161 0.669220

1 -2.700765 -0.020148 -1.345012

6 -1.867990 1.508648 -0.072438

1 -4.133341 0.042725 0.662082

1 -2.782631 -0.472368 1.672476

1 -3.445779 -1.565287 0.450608

1 -2.763829 2.126237 -0.073153

1 -1.180071 1.899716 -0.819801

1 -1.393643 1.596235 0.904295

Structure 10d

6 1.651064 -0.016050 -0.000008

8 0.421105 -0.109440 0.000024

6 2.339833 1.323987 0.000005

6 2.531963 -1.237705 -0.000041

6 -2.274488 0.083243 0.000104

1 -1.986056 0.628099 -0.889146

1 -1.986076 0.627811 0.889529

1 -1.827584 -0.901110 -0.000020

7 -3.779260 -0.063960 -0.000069

1 -4.103966 -0.574911 -0.823562

1 -4.104135 -0.575051 0.823266

1 -4.247254 0.844656 -0.000019

1 2.981711 1.413137 0.876501

1 1.604420 2.122755 0.000043

1 2.981663 1.413178 -0.876521

1 1.923181 -2.136534 -0.000045

1 3.179935 -1.229834 0.876506

1 3.179908 -1.229807 -0.876607

Structure 11

6 -.799210 .000001 -.003970

7 .707761 -.000001 .003518

1 1.078080 -.000008 .957176

1 1.085174 .824291 -.470511

1 1.085172 -.824287 -.470522

1 -1.130709 .000009 -1.035680

1 -1.138390 .892049 .509374

1 -1.138392 -.892053 .509362

Structure 12a

6 -.225761 .405842 -.000008

8 -1.240187 -.276888 -.000008

6 1.169457 -.151022 .000013

1 -.292234 1.509308 -.000024

1 1.708506 .206678 -.877924

1 1.134564 -1.236496 .000021

1 1.708486 .206693 .877956

Structure 12b

6 -.920539 .437865 -.000004

8 -1.393574 -.690487 -.000030

6 .555437 .736663 .000020

1 -1.582552 1.323801 .000002

1 .759868 1.368507 -.869967

6 1.417953 -.514145 .000009

1 .759846 1.368477 .870034

1 2.474531 -.254074 .000023

1 1.209902 -1.122547 -.877128

1 1.209885 -1.122573 .877125

Structure 12c

6 0.915565 -0.633466 0.214996

8 1.885224 -0.076099 -0.280944

6 -0.433380 0.011283 0.425073

1 0.980664 -1.690972 0.538600

1 -0.619618 -0.033862 1.505381

6 -1.506112 -0.836431 -0.266090

6 -0.440433 1.459304 -0.038582

1 -2.497940 -0.443575 -0.048248

1 -1.473327 -1.873995 0.067220

1 -1.364433 -0.820423 -1.346985

1 -1.407753 1.918489 0.160584

1 -0.244753 1.513607 -1.108446

1 0.331532 2.035386 0.467057

Structure 12d

6 .000000 .179675 .000000

8 .000000 1.406554 .000000

6 1.286018 -.617021 .000001

6 -1.286018 -.617021 -.000001

1 1.328881 -1.262317 .877916

1 2.133756 .061452 .000044

1 1.328919 -1.262246 -.877966

1 -1.328881 -1.262317 -.877916

1 -2.133756 .061452 -.000044

1 -1.328919 -1.262246 .877966

Structure 13a

6 0.526582 0.472600 0.392646

8 1.403750 0.053777 -0.420942

6 -0.640407 1.173626 -0.079140

1 0.662349 0.242098 1.450275

6 2.565788 -0.726221 0.053203

1 2.501271 -1.678583 -0.458799

1 2.514619 -0.834238 1.132270

1 3.435870 -0.163808 -0.262619

1 -1.491799 0.434396 -0.023287

1 -0.526670 1.521982 -1.100461

1 -0.902160 1.973088 0.612650

7 -3.108183 -0.688304 -0.012200

1 -3.319544 -1.226460 0.821940

1 -3.893752 -0.057103 -0.134047

1 -3.164682 -1.343488 -0.785241

Structure 13b,cis

6 -.622359 -.133400 .639577

8 -1.516909 .006036 -.250917

6 .586996 .647858 .603358

1 -.779990 -.896468 1.403907

6 -2.720954 -.848351 -.251834

1 -3.558947 -.164634 -.192482

1 -2.685273 -1.528014 .594124

1 -2.703766 -1.372731 -1.199578

1 1.378660 -.114821 .333238

1 .842392 .905011 1.635957

6 .611599 1.822495 -.361935

1 1.586407 2.299668 -.318153

1 -.143013 2.563245 -.106627

1 .439712 1.491632 -1.383194

7 2.959855 -1.164023 -.221988

1 3.195754 -1.021171 -1.198727

1 3.759020 -.823745 .303193

1 2.953638 -2.169714 -.085403

Structure 13b,trans

6 0.673705 0.236615 0.214303

8 1.657342 -0.204666 -0.455538

6 -0.553348 0.631395 -0.430712

1 0.771280 0.267618 1.301852

6 2.879352 -0.681571 0.222496

1 2.979717 -1.722629 -0.059730

1 2.772560 -0.555179 1.295553

1 3.685183 -0.081884 -0.182712

1 -1.248204 -0.233306 -0.226953

1 -0.411518 0.698786 -1.507750

6 -1.195226 1.878558 0.194550

1 -2.182138 2.014446 -0.238115

1 -0.608328 2.771935 -0.003388

1 -1.313887 1.763503 1.270603

7 -2.756479 -1.497267 0.071441

1 -2.532372 -2.486605 0.039844

1 -3.279643 -1.361297 0.930414

1 -3.422935 -1.347173 -0.679230

Structure 13c

6 .737910 .005784 -.476349

8 1.725165 .161886 .310230

6 -.512533 -.541894 -.019100

1 .852414 .348354 -1.507452

6 2.963656 .811893 -.158778

1 3.084161 1.692289 .461026

1 2.867910 1.062102 -1.211048

1 3.753181 .092029 .019415

1 -1.161103 .387887 -.025031

6 -.484375 -1.126907 1.385527

6 -1.140615 -1.459034 -1.084072

1 -2.171621 -1.656098 -.802251

1 -.611821 -2.408867 -1.138980

1 -1.143004 -.996719 -2.070509

7 -2.625373 1.714861 .059755

1 -2.414338 2.671765 -.204730

1 -3.412597 1.439434 -.518596

1 -2.987589 1.767057 1.006415

1 -1.495150 -1.404475 1.674054

1 -.105247 -.412007 2.112297

1 .136833 -2.020920 1.421897

Structure 13d’’

6 1.032112 -0.180045 0.050925

8 0.774100 1.018977 -0.293446

6 0.178282 -0.925261 0.994625

6 2.235159 -0.771349 -0.568002

6 -0.409601 1.734157 0.237722

1 -0.443097 2.640595 -0.351208

1 -0.220991 1.951687 1.284254

1 -1.282064 1.105212 0.089262

1 -0.838360 -0.970773 0.580655

1 0.115920 -0.384318 1.941429

1 0.571962 -1.920469 1.168305

7 -2.877790 -0.656073 -0.417557

1 -3.031278 -1.659961 -0.419942

1 -3.623007 -0.279341 0.160138

1 -3.093148 -0.354849 -1.363046

1 1.942964 -1.683808 -1.091059

1 2.920387 -1.072149 0.226966

1 2.716737 -0.076145 -1.246909

Structure 14a

6 .448407 .601308 .322378

8 1.270952 -.022762 -.453703

6 -.763586 1.102419 -.155786

1 .707255 .654493 1.380073

6 2.487433 -.613731 .104853

1 2.439957 -1.675283 -.109351

1 2.536772 -.425544 1.173901

1 3.316530 -.149929 -.416591

1 -1.636718 .156681 .019828

1 -.797951 1.267923 -1.227682

1 -1.169884 1.903114 .452900

7 -2.769965 -.742093 .071128

1 -2.930973 -1.124366 .999601

1 -3.614669 -.245198 -.201000

1 -2.661696 -1.525118 -.568620

Structure 14b,cis

6 -.591412 .005410 .697807

8 -1.419685 .090462 -.294408

6 .672268 .594365 .639678

1 -.892905 -.606342 1.548505

6 -2.682376 -.645153 -.244507

1 -3.465519 .088675 -.394585

1 -2.787111 -1.142684 .715927

1 -2.660362 -1.359570 -1.059914

1 1.399325 -.405304 .276093

1 1.080168 .758276 1.635840

6 .949590 1.665496 -.399119

1 2.015006 1.879201 -.441508

1 .431069 2.589844 -.152118

1 .620620 1.346349 -1.385448

7 2.469367 -1.293611 -.218074

1 2.469686 -1.360793 -1.232586

1 3.380773 -.938093 .059263

1 2.392746 -2.238684 .149156

Structure 14b,trans

6 -.589147 -.419559 .172303

8 -1.573755 .125471 -.469271

6 .663810 -.589593 -.415813

1 -.755525 -.670070 1.221723

6 -2.823185 .406745 .235305

1 -2.955940 1.482878 .220774

1 -2.772514 .027673 1.252531

1 -3.605990 -.086279 -.329043

1 1.235091 .523033 -.099005

1 .641486 -.514114 -1.501670

6 1.593813 -1.641190 .173813

1 2.625805 -1.423568 -.092733

1 1.354164 -2.632480 -.203945

1 1.526151 -1.662583 1.260896

7 2.151582 1.655023 .091519

1 2.497561 1.726609 1.044972

1 2.961593 1.562290 -.516167

1 1.705332 2.539265 -.138453

Structure 14c

6 .691620 -.244852 -.482146

8 1.664718 .004068 .339061

6 -.597898 -.534131 -.030645

1 .899031 -.137705 -1.548408

6 2.944138 .473783 -.189033

1 3.068789 1.498538 .143957

1 2.947989 .406792 -1.273739

1 3.701390 -.167823 .245680

1 -1.041681 .655708 -.113954

6 -.775157 -.884081 1.435977

6 -1.497187 -1.272708 -1.015302

1 -2.541833 -1.065367 -.789968

1 -1.346059 -2.348109 -.934414

1 -1.306677 -.974460 -2.045986

7 -1.915105 1.889839 -.020315

1 -2.008770 2.368827 -.912095

1 -2.854083 1.654800 .289765

1 -1.543477 2.562070 .645552

1 -1.824281 -.795075 1.712190

1 -.187115 -.234124 2.079928

1 -.468327 -1.913542 1.618104

Structure 14d’’

6 -.515155 .534184 .177068

8 -1.414033 -.203617 -.421390

6 .473038 .047476 1.041054

6 -.598482 1.962000 -.240026

6 -1.537838 -1.612572 -.086458

1 -2.349561 -1.969893 -.706640

1 -1.781000 -1.717502 .967273

1 -.612897 -2.129671 -.327751

1 1.536085 -.189766 .242193

1 .296186 -.903035 1.529473

1 .891993 .807714 1.691400

7 2.734978 -.459337 -.387962

1 3.310829 .377345 -.450284

1 3.262766 -1.152693 .137586

1 2.612240 -.817772 -1.332352

1 .290270 2.512248 .052822

1 -1.464766 2.411213 .247825

1 -.754111 2.029574 -1.314517

Structure 15a

6 0.778949 0.817405 0.340190

8 0.377726 -0.423123 -0.158070

6 0.319595 1.943552 -0.204054

1 1.431173 0.771537 1.204614

6 1.398695 -1.448922 -0.080743

1 0.941604 -2.363859 -0.441391

1 1.728419 -1.571196 0.949822

1 2.234046 -1.171273 -0.717667

1 -2.440724 0.488757 0.405852

1 -0.277496 1.935911 -1.104467

1 0.588735 2.893504 0.228447

7 -2.243924 -0.455315 0.073971

1 -2.621352 -1.127762 0.740471

1 -2.698297 -0.591221 -0.828396

1 -1.183874 -0.564423 -0.022887

Structure 15b,cis

6 -.027786 -.934685 .684328

8 .839200 -.191751 -.128253

6 -1.346433 -.923386 .471504

1 .456128 -1.462861 1.497224

6 2.096413 -.858084 -.400358

1 1.904078 -1.767679 -.962842

1 2.607053 -1.089269 .533344

1 2.688468 -.168985 -.993165

1 .200410 2.568242 1.188093

1 -1.949241 -1.469806 1.184971

6 -2.038495 -.248665 -.671743

1 -2.662366 .580829 -.329869

1 -2.708256 -.946836 -1.171011

1 -1.325167 .111078 -1.411174

7 .198774 2.324566 .198361

1 .564143 1.322776 .060362

1 -.757360 2.378198 -.152154

1 .774895 2.995281 -.308668

Structure 15b,trans

6 .486264 -.492570 .310362

8 -.842969 -.512866 -.137918

6 1.420471 .170918 -.374295

1 .658314 -1.015580 1.245256

6 -1.462981 -1.818798 -.050934

1 -2.489589 -1.696558 -.379837

1 -1.435715 -2.178442 .976741

1 -.937274 -2.507068 -.707377

1 -.949050 2.455769 .309114

1 1.144256 .615099 -1.324968

6 2.838503 .295438 .086355

1 3.119239 1.340067 .218712

1 3.515075 -.130401 -.653343

1 2.995104 -.222023 1.030768

7 -1.777731 1.908295 .079322

1 -2.476942 2.045779 .807729

1 -2.155024 2.237851 -.808228

1 -1.494073 .870442 .004590

Structure 15c

6 -.213792 -.672319 -.479390

8 1.051254 -.522365 .116447

6 -1.292280 -.045628 .008438

1 -.220924 -1.302253 -1.362345

6 1.755296 -1.776168 .289391

1 2.721559 -1.532623 .719013

1 1.882273 -2.270579 -.672841

1 1.190226 -2.409774 .967751

1 1.099598 2.265142 -1.004963

6 -1.264411 .779915 1.261828

6 -2.607571 -.169349 -.704189

1 -2.978001 .811737 -1.004372

1 -3.353552 -.605045 -.039211

1 -2.533539 -.794172 -1.592255

7 1.862563 1.875996 -.452254

1 2.727760 1.950189 -.985327

1 1.954959 2.417621 .406020

1 1.632170 .844414 -.218808

1 -1.502263 1.823764 1.046263

1 -.302330 .724436 1.766211

1 -2.029368 .425382 1.952593

Structure 15d’’

6 -0.451335 0.544575 0.207817

8 -1.353244 -0.120997 -0.530962

6 0.286933 0.012119 1.223159

6 -0.333547 1.961259 -0.260055

6 -1.703667 -1.453045 -0.122613

1 -2.473828 -1.772246 -0.814218

1 -2.085298 -1.449473 0.896740

1 -0.840706 -2.116336 -0.193111

1 1.766247 -0.365957 0.108358

1 0.073128 -0.962040 1.636936

1 0.851136 0.695345 1.842524

7 2.682491 -0.616110 -0.389408

1 3.292732 0.200785 -0.425924

1 3.156785 -1.362681 0.119320

1 2.488707 -0.930080 -1.340752

1 0.458663 2.488864 0.264524

1 -1.276479 2.474096 -0.077155

1 -0.152884 1.991016 -1.333540

Structure 16

7 .000000 .000000 .000001

1 1.022719 .000000 -.000001

1 -.340909 .000000 -.964227

1 -.340906 .835047 .482116

1 -.340906 -.835047 .482116

Structure 17a

6 .737237 -.570977 -.000001

8 -.616307 -.724709 -.000008

6 1.439478 .570411 .000010

6 -1.361253 .487379 -.000002

1 -1.139724 1.080731 -.889070

1 -1.139727 1.080720 .889075

1 -2.406432 .196158 -.000005

1 .990602 1.549734 .000014

1 2.515489 .509734 .000015

1 1.217479 -1.540281 -.000005

Structure 17b’,cis

6 0.061300 0.734383 -0.085455

8 0.842782 -0.375017 -0.297373

6 -1.266820 0.651446 0.057433

1 0.588496 1.684733 -0.084580

6 2.177025 -0.219813 0.174526

1 2.207159 -0.140320 1.263029

1 2.647626 0.665260 -0.261186

1 2.719852 -1.106165 -0.139808

1 -1.806121 1.584928 0.151930

6 -2.035909 -0.632073 0.063137

1 -2.688997 -0.692050 0.934402

1 -2.667872 -0.719758 -0.821978

1 -1.355977 -1.480139 0.079333

Structure 17b,trans

6 .024478 .691305 .000000

8 -1.340771 .676175 .000000

6 .869068 -.351808 .000000

1 .382044 1.713595 .000000

6 -1.933627 -.615583 .000000

1 -1.643336 -1.179443 .888950

1 -1.643336 -1.179442 -.888951

1 -3.006580 -.452754 .000000

1 .496453 -1.366807 .000000

6 2.355738 -.159959 .000001

1 2.817259 -.613729 -.878318

1 2.612466 .899175 .000001

1 2.817258 -.613729 .878319

Structure 17c’

6 -0.291423 -0.503257 -0.167208

8 -1.371492 0.332267 -0.332706

6 0.956484 -0.039832 -0.004338

1 -0.511267 -1.567500 -0.224761

6 -2.566439 -0.193229 0.235487

1 -2.493766 -0.259650 1.323069

1 -2.790102 -1.184839 -0.167140

1 -3.364493 0.491977 -0.034878

6 1.260118 1.426308 0.077013

1 1.849934 1.645152 0.969481

1 1.849671 1.749004 -0.783795

1 0.345270 2.012260 0.106332

6 2.111739 -0.994642 0.063574

1 2.674977 -0.857309 0.989020

1 1.781236 -2.032195 0.018609

1 2.807612 -0.827124 -0.761453

Structure 17d’’

6 0.471084 0.121380 0.000001

8 -0.583411 -0.754489 -0.000038

6 0.376146 1.461140 0.000061

6 -1.879182 -0.168657 -0.000019

1 -2.030713 0.446245 -0.889079

1 -2.030730 0.446149 0.889105

1 -2.580401 -0.997117 -0.000071

1 -0.561091 1.991820 0.000084

1 1.280721 2.047037 0.000085

6 1.757893 -0.641852 -0.000008

1 1.812589 -1.282555 -0.879408

1 2.608636 0.034774 -0.000042

1 1.812628 -1.282512 0.879421

Table S5. Scaled vibrational frequencies (MP2/6-31G(d.p)) for the structures used in the RRKM-calculations.

Structure 3a

62.0 179.0 198.0 252.0 284.0 355.0 435.0 493.0 798.0 869.0

919.0 934.0 1077.0 1112.0 1143.0 1157.0 1203.0 1234.0 1363.0 1384.0

1419.0 1464.0 1468.0 1473.0 1485.0 1497.0 1503.0 1607.0 1632.0 3001.0

3009.0 3017.0 3106.0 3115.0 3129.0 3164.0 3316.0 3429.0 3450.0

Structure 3b

52.0 108.0 178.0 187.0 238.0 263.0 278.0 362.0 463.0 591.0

765.0 785.0 886.0 903.0 987.0 1000.0 1093.0 1113.0 1131.0 1153.0

1165.0 1232.0 1275.0 1363.0 1374.0 1380.0 1420.0 1456.0 1467.0 1476.0

1492.0 1498.0 1502.0 1505.0 1607.0 1630.0 2992.0 3007.0 3010.0 3017.0

3073.0 3100.0 3104.0 3131.0 3161.0 3320.0 3432.0 3451.0

Structure 3c

64.0 76.0 145.0 184.0 205.0 226.0 241.0 263.0 336.0 339.0

413.0 464.0 596.0 751.0 804.0 900.0 922.0 925.0 965.0 1013.0

1039.0 1098.0 1138.0 1152.0 1166.0 1203.0 1229.0 1323.0 1348.0 1368.0

1389.0 1399.0 1424.0 1435.0 1470.0 1482.0 1489.0 1490.0 1498.0 1506.0

1509.0 1617.0 1624.0 2988.0 2995.0 3001.0 3012.0 3015.0 3091.0 3094.0

3107.0 3124.0 3126.0 3162.0 3322.0 3445.0 3451.0

Structure 3d

28.0 178.0 205.0 259.0 272.0 283.0 335.0 352.0 406.0 457.0

496.0 713.0 822.0 889.0 921.0 933.0 1025.0 1029.0 1099.0 1155.0

1171.0 1212.0 1281.0 1300.0 1405.0 1413.0 1460.0 1463.0 1463.0 1479.0

1484.0 1499.0 1501.0 1507.0 1603.0 1630.0 3014.0 3016.0 3019.0 3109.0

3113.0 3114.0 3128.0 3130.0 3158.0 3315.0 3429.0 3454.0

Structure 4a

-1395.5 101.0 165.0 242.0 284.0 340.0 402.0 467.0 664.0 768.0 879.0

974.0 993.0 1044.0 1063.0 1130.0 1147.0 1170.0 1238.0 1317.0 1375.0

1399.0 1425.0 1454.0 1476.0 1482.0 1484.0 1490.0 1606.0 2017.0 3021.0

3034.0 3076.0 3124.0 3129.0 3152.0 3181.0 3424.0 3526.0

Structure 4b

-1392.3 95.0 108.0 157.0 208.0 221.0 285.0 372.0 440.0 464.0 662.0

776.0 824.0 872.0 972.0 1011.0 1016.0 1051.0 1061.0 1132.0 1146.0

1165.0 1215.0 1287.0 1296.0 1348.0 1385.0 1403.0 1422.0 1453.0 1477.0

1483.0 1490.0 1498.0 1500.0 1605.0 2015.0 3017.0 3022.0 3034.0 3063.0

3081.0 3109.0 3127.0 3152.0 3180.0 3424.0 3527.0

Structure 4c

-1385.6 85.0 111.0 156.0 205.0 217.0 234.0 269.0 319.0 378.0 411.0

444.0 472.0 688.0 805.0 843.0 915.0 928.0 966.0 1005.0 1020.0

1042.0 1072.0 1132.0 1144.0 1164.0 1183.0 1229.0 1296.0 1320.0 1333.0

1392.0 1400.0 1414.0 1427.0 1452.0 1480.0 1484.0 1489.0 1492.0 1502.0

1509.0 1601.0 2005.0 3000.0 3008.0 3010.0 3033.0 3058.0 3097.0 3103.0

3117.0 3119.0 3153.0 3182.0 3423.0 3525.0

Structure 4d

-1360.6 106.0 172.0 247.0 259.0 305.0 327.0 343.0 368.0 439.0 467.0

635.0 674.0 815.0 938.0 975.0 980.0 990.0 1044.0 1064.0 1146.0

1167.0 1172.0 1261.0 1338.0 1357.0 1412.0 1419.0 1450.0 1469.0 1475.0

1482.0 1489.0 1496.0 1501.0 1605.0 2036.0 3016.0 3019.0 3041.0 3113.0

3120.0 3123.0 3127.0 3160.0 3174.0 3422.0 3525.0

Structure 9a

-504.7 60.0 111.0 117.0 136.0 150.0 268.0 301.0 322.0 546.0 570.0

593.0 811.0 915.0 1124.0 1146.0 1156.0 1164.0 1224.0 1269.0 1376.0

1393.0 1408.0 1411.0 1443.0 1452.0 1644.0 1646.0 1682.0 3001.0 3008.0

3086.0 3103.0 3154.0 3303.0 3321.0 3395.0 3534.0 3535.0

Structure 9b

-511.2 54.0 76.0 96.0 132.0 150.0 196.0 243.0 294.0 300.0 382.0

572.0 578.0 676.0 682.0 886.0 915.0 999.0 1112.0 1133.0 1156.0

1158.0 1224.0 1262.0 1267.0 1368.0 1392.0 1393.0 1408.0 1413.0 1428.0

1495.0 1496.0 1644.0 1645.0 1669.0 2982.0 2995.0 3026.0 3033.0 3102.0

3128.0 3134.0 3303.0 3321.0 3394.0 3534.0 3535.0

Structure 9c

-517.1 48.0 68.0 85.0 95.0 142.0 198.0 217.0 248.0 275.0 296.0

350.0 384.0 420.0 580.0 583.0 658.0 815.0 913.0 946.0 953.0

972.0 1113.0 1142.0 1157.0 1159.0 1194.0 1224.0 1266.0 1270.0 1359.0

1392.0 1392.0 1400.0 1407.0 1423.0 1480.0 1488.0 1500.0 1503.0 1644.0

1645.0 1659.0 2973.0 2983.0 3013.0 3022.0 3102.0 3108.0 3117.0 3122.0

3124.0 3302.0 3321.0 3394.0 3534.0 3535.0

Structure 9d

-530.7 54.0 76.0 91.0 112.0 141.0 163.0 257.0 297.0 304.0 393.0

478.0 549.0 585.0 605.0 801.0 880.0 938.0 1065.0 1096.0 1138.0

1157.0 1218.0 1258.0 1280.0 1387.0 1395.0 1397.0 1409.0 1446.0 1452.0

1462.0 1484.0 1643.0 1645.0 1661.0 3008.0 3011.0 3093.0 3105.0 3115.0

3145.0 3152.0 3320.0 3327.0 3394.0 3534.0 3535.0

Structure 14a

-781.7 31.0 70.0 85.0 137.0 262.0 318.0 420.0 434.0 529.0 625.0

714.0 878.0 928.0 1051.0 1076.0 1151.0 1152.0 1258.0 1270.0 1378.0

1430.0 1441.0 1463.0 1469.0 1481.0 1498.0 1634.0 1639.0 1647.0 3037.0

3076.0 3083.0 3159.0 3176.0 3179.0 3385.0 3527.0 3530.0

Structure 14b,cis

-653.6 33.0 66.0 78.0 121.0 151.0 166.0 196.0 370.0 381.0 434.0

471.0 620.0 668.0 849.0 916.0 933.0 1014.0 1061.0 1097.0 1144.0

1150.0 1193.0 1254.0 1343.0 1386.0 1404.0 1430.0 1437.0 1469.0 1477.0

1490.0 1498.0 1500.0 1634.0 1637.0 1646.0 3024.0 3036.0 3072.0 3087.0

3118.0 3124.0 3157.0 3174.0 3388.0 3529.0 3531.0

Structure 14c

-433.3 26.0 64.0 73.0 103.0 159.0 163.0 197.0 214.0 250.0 321.0

401.0 428.0 445.0 469.0 551.0 739.0 821.0 942.0 963.0 996.0

1021.0 1051.0 1075.0 1149.0 1158.0 1212.0 1247.0 1304.0 1367.0 1376.0

1399.0 1401.0 1422.0 1466.0 1470.0 1476.0 1489.0 1494.0 1498.0 1507.0

1634.0 1639.0 1659.0 3010.0 3016.0 3035.0 3064.0 3105.0 3107.0 3108.0

3120.0 3154.0 3174.0 3391.0 3533.0 3533.0

Structure 14d’’

-1019.3 20.0 63.0 85.0 103.0 194.0 205.0 298.0 394.0 432.0 440.0

510.0 535.0 612.0 733.0 831.0 944.0 946.0 1003.0 1046.0 1095.0

1143.0 1187.0 1282.0 1363.0 1401.0 1415.0 1450.0 1458.0 1472.0 1479.0

1486.0 1494.0 1499.0 1600.0 1640.0 1640.0 3018.0 3031.0 3089.0 3106.0

3139.0 3144.0 3180.0 3183.0 3379.0 3520.0 3521.0

Table S6. Calculated and anticipated **ae** and **sub** transition structure energies relative to the reactants on the G2 level. The results for the reactions between CH2OR+ and NH3 are taken from ref. [2]. All values are given in kJ/mol.

|  | | | **E(TS, ae) (MP2)** | **E(TS, ae)**  **(G2)** | **Devi-ation** | | **E(TS, sub) (MP2)** | **E(TS, sub)**  **(G2)** | **Devi-ation** | |
| --- | --- | --- | --- | --- | --- | --- | --- | --- | --- | --- |
| **CH2OH+ + NH3** | | | -101.6 | -74.4 | 27.2 | | - | - | - | |
| **CH2OCH3+ + NH3** | | | -73.8 | -45.6 | 28.2 | | -38.3 | -22.3 | 16 | |
| **CH2OC2H5+ + NH3** | | | -66.1 | -37.9 | 28.2 | | -20.1 | -8.6 | 11.5 | |
| **(CH3)2COCH3+ + NH3** | | | -10.8 | +20.6 | 31.4 | | - | - | - | |
| **Average deviation between MP2 and G2 energies** | | |  |  | **29** | |  |  | **14** | |
|  |  |  |  |  |  | |  |  |  | |
| **R1R2COCH3+ + NH3** | | | **E(TS, ae) (MP2)** | **E(TS, ae) (G2, anticipated)a** | |  | **E(TS, sub) (MP2)** | **E(TS, sub) (G2, anticipated)a** | |  |
| **R1=H;** | **R2=** | **CH3** | -34.4 | -5 |  | | -19.0 | -5 |  | |
|  |  | **C2H5** | -29.6 | -1 |  | | -15.6 | -2 |  | |
|  |  | ***i*-C3H7** | -29.9 | -1 |  | | -12.2 | +2 |  | |
| **R1= CH3;** | **R2=** | **CH3** | -10.8 | +20.6b |  | | -1.1 | +13 |  | |

a The anticipated G2 energies are calculated by adding 29 and 14 kJ/mol to the MP2 energies of the **ae** and **sub** energies, respectively.

b Calculated value.

Table S7: Mulliken population (total atomic charges) at the carbonyl carbon in the reactant oxonium ions taken from the MP2/3-21G(d,p) calculations.

| **R1R2COCH3+** | | | **Mulliken population** |
| --- | --- | --- | --- |
| **R1=H;** | **R2=** | H | 0.31 |
|  |  | **CH3** | 0.45 |
|  |  | **C2H5** | 0.46 |
|  |  | ***i*-C3H7** | 0.48 |
| **R1= CH3;** | **R2=** | **CH3** | 0.58 |
